# Supplementary material for: RIPK3 promotes kidney fibrosis via AKT-dependent ATP citrate lyase
Source: JCI journal article supplement (doi:10.1172/jci.insight.94979), 2018-02-07
Supplement: sd1 [file 1]

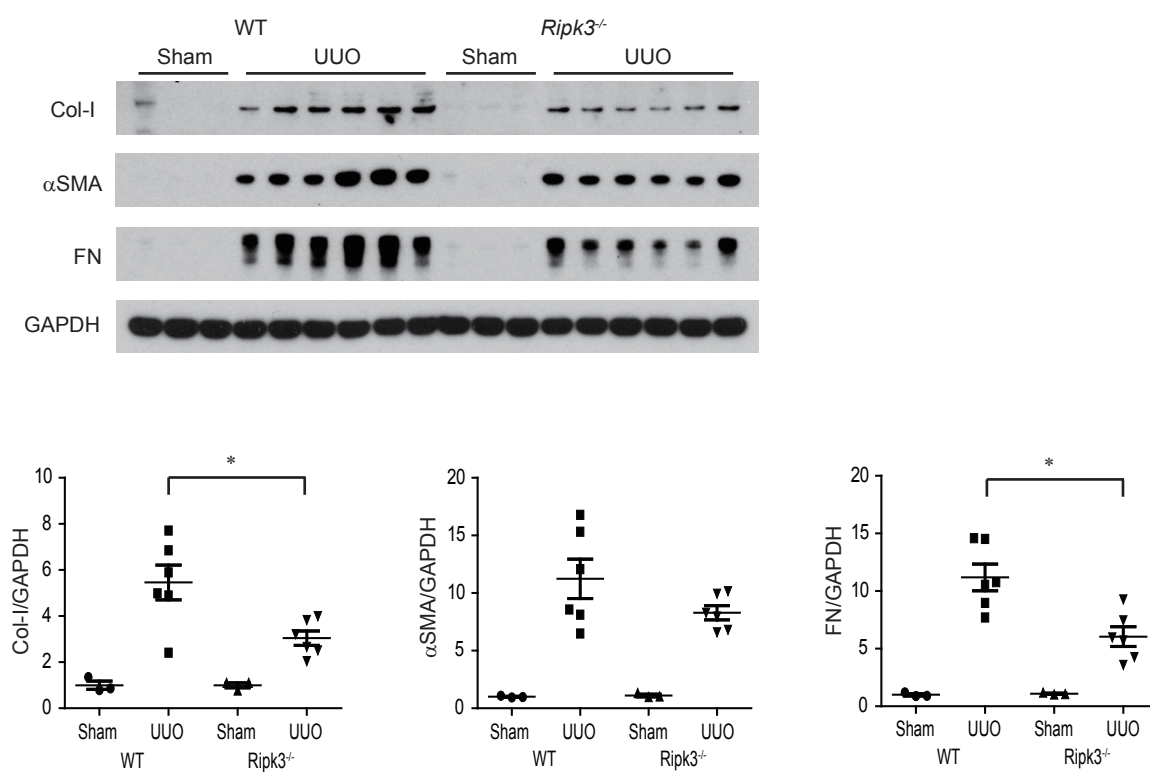

**Supplemental Figure 1.** Western blot analysis at 13 days after UUO or sham surgery. WT or *Ripk3*<sup>-/-</sup> mice were subjected to sham operation or UUO and kidneys were harvested at 13 d after surgery. Kidney tissue lysates were subjected to Western blot analysis for  $\alpha$ -smooth muscle actin ( $\alpha$ SMA), Type-I collagen (Col-I), and fibronectin (FN). GAPDH was the standard. ( $n = 6$  for UUO,  $n = 3$  for Sham) Dot plots are densitometric analysis of Western blot data (mean  $\pm$  s.e.m). \* $P < 0.05$  compared with WT UUO mice by ANOVA with Newman-Keuls post-hoc test.

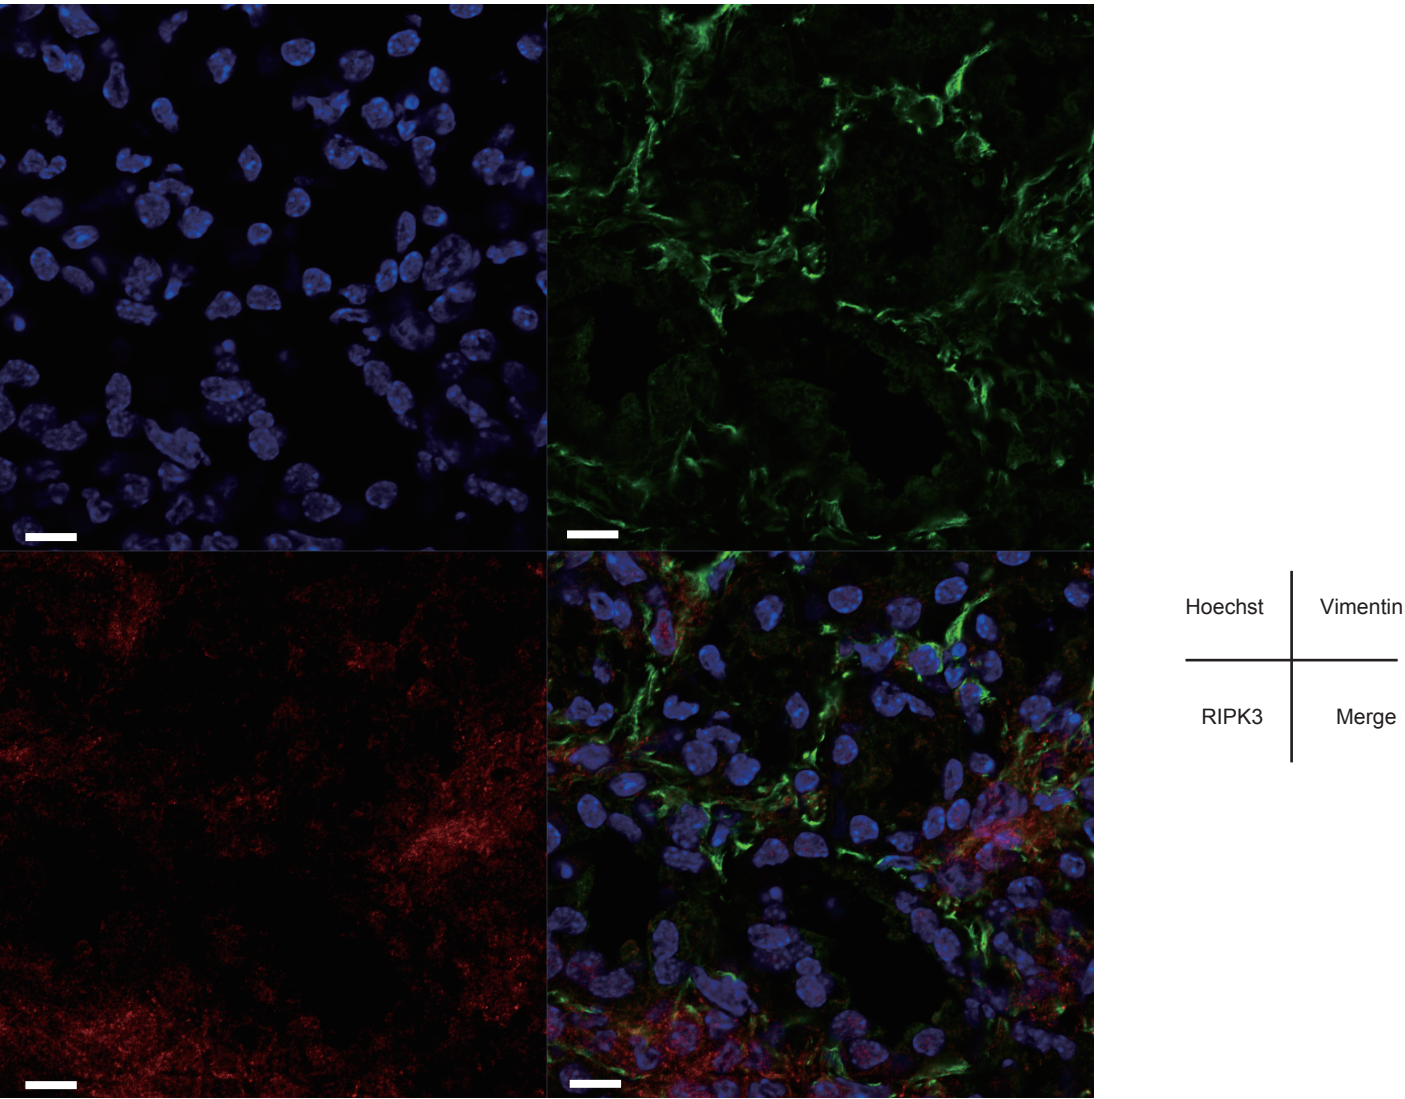

**Supplemental Figure 2.** Immunofluorescence staining for RIPK3 (red), Vimentin (green), and Hoechst (Blue) in the kidney of WT mice 7 days after UUO surgery. Single channel and merged staining as indicated. Scale bars, 10  $\mu$ m.

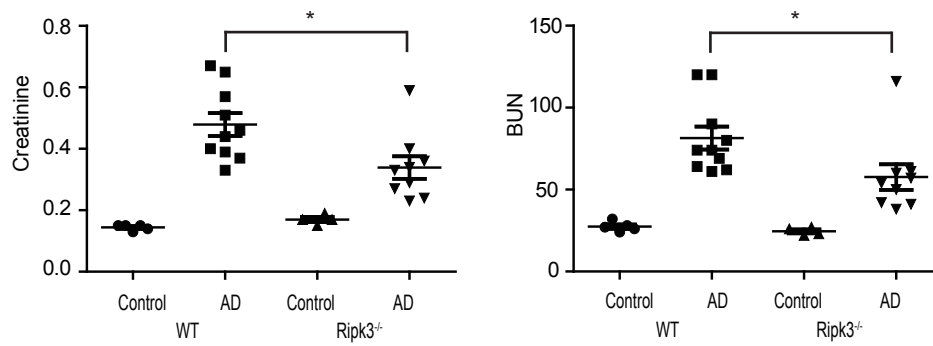

**Supplemental Figure 3.** Renal function at 7 days after adenine diet. WT or *Ripk3*<sup>-/-</sup> mice were subjected to control or 0.2% adenine diet (AD) and serum was harvested at 7 d. Serum creatinine and BUN were measured (mean ± s.e.m). \**P* < 0.05 compared with WT AD-fed mice by ANOVA with Newman-Keuls post-hoc test. WT control diet (n=5), WT AD (n=10), *Ripk3*<sup>-/-</sup> Control diet (n=4), *Ripk3*<sup>-/-</sup> AD (n=9).

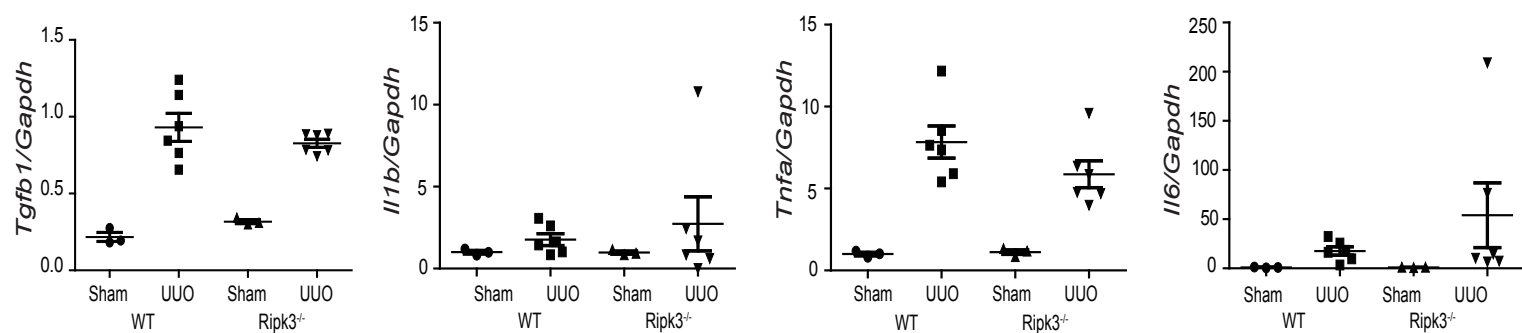

**Supplemental Figure 4.** Cytokine expression at 3 days after UUO. WT and *Ripk3*<sup>-/-</sup> mice were subjected to UUO or sham surgery and kidneys were harvested after 3 d. Expression of *Tgfb1*, *Il1b*, *Tnfa*, and *Il6* mRNA was analyzed by qRT-PCR. *Gapdh* was the standard. Values represent mean ± s.e.m (n=6 for UUO, n=3 for Sham).

**Supplemental Table 1.** Patient characteristics.

| Subject number | Age | Gender | History                          | Serum Creatinine | Diagnosis                                                        |
|----------------|-----|--------|----------------------------------|------------------|------------------------------------------------------------------|
| 1              | 51  | Male   | Clear Cell Renal Carcinoma, HTN  | 1.3              | Normal kidney tissue margins (nephrectomies for renal carcinoma) |
| 2              | 72  | Male   | Clear Cell Renal Carcinoma, HTN  | 1.3              | Normal kidney tissue margins (nephrectomies for renal carcinoma) |
| 3              | 61  | Female | Clear Cell Renal Carcinoma, HTN  | 1.4              | Normal kidney tissue margins (nephrectomies for renal carcinoma) |
| 4              | 57  | Male   | Unclassified kidney tumor        | 1.5              | Normal kidney tissue margins (nephrectomies for renal carcinoma) |
| 5              | 78  | Male   | Clear Cell Renal Carcinoma, HTN  | 1.5              | Normal kidney tissue margins (nephrectomies for renal carcinoma) |
| 6              | 48  | Male   | RT                               | 2.05             | Acute tubular injury                                             |
| 7              | 39  | Male   | RT                               | 1.51             | Acute tubular injury                                             |
| 8              | 47  | Male   | Prograf<br>SLE, LRT, RT          | 7.63             | Acute tubular injury                                             |
| 9              | 68  | Female | Prograf<br>RT                    | 3.33             | Acute tubular injury , ATN                                       |
| 10             | 48  | Female | HTN, LURT<br>DGF                 | 2.09             | Acute tubular injury , ATN                                       |
| 11             | 72  | Male   | DM, HTN, DDRT                    | 5.56             | DM nephropathy with extensive TIF                                |
| 12             | 57  | Female | DM, DDRT                         | 3.52             | DM nephropathy with widespread TIF                               |
| 13             | 50  | Male   | DM, DDRT                         | 1.53             | DM nephropathy with extensive TIF                                |
| 14             | 68  | Female | DM, uncontrolled, DDRT           | 2.84             | DM nephropathy with moderate TIF                                 |
| 15             | 64  | Male   | HTN, DM, PVD<br>RT               | 2.92             | DM nephropathy with extensive TIF                                |
| 16             | 85  | Male   | ESRD unknown etiology, CAD, DDRT | 1.13             | DM nephropathy with minimal TIF (Donor had DM)                   |

RT: renal transplantation, LURT: living unrelated renal transplantaion, LRT: living related donor renal transplantaion, DM: diabetes mellitus, HTN: hypertension, CAD: coronary artery disease, SLE: systemic lupus erythematosus, DGF: delayed graft function , ATN: acute tubular necrosis, TIF: tubular interstitial fibrosis, DDRT: deceased-donor renal Transplant , PVD: peripheral vascular disease, ESRD: end-stage renal disease

**Supplemental Table 2.** Primers used for qRT-PCR.

| Gene    | Forward primer (5'-3')    | Reverse primer (5'-3')   |
|---------|---------------------------|--------------------------|
| mRIPK3  | CTCCGTGCCTTGACCTACTG      | AACCATAGCCTTCACCTCCC     |
| mCol1a1 | AGCTTTGTGGATACGCGGAC      | TAGGCACGAAGTTACTGCAAG    |
| mActa2  | GCTGGTGATGATGCTCCCA       | GCCCATTCCAACCATTACTCC    |
| mTGFb1  | AACTATTGCTTCAGCTCCAGAGAGA | AGTTGGATGGTAGCCCTTG      |
| mIl1b   | CAACCAACAAGTGATATTCTCCAT  | GATCCACACTCTCCAGCTGCA    |
| mTnfa   | GCGGTGCCTATGTCTCAG        | GCCATTTGGGAACCTTCTCATC   |
| mIl6    | ACAACCACGGCCTTCCCTACTT    | CACGATTTCCCAGAGAACATGTG  |
| mGAPDH  | TCAACAGCAACTCCCCTCTTCCA   | ACCCTGTTGCTGTAGCCGTATTCA |
| hRIPK3  | AATTCGTGGCTGCGCCTAGAAG    | TCGTGCAGGTAAAACATCCCA    |
| hGAPDH  | ACCAAATCCGTTGACTCCGAC     | CTCCTGTTTCGACAGTCAGCC    |
